# Supplementary material
Source: publisher figshare collection journal article supplement (https://acs.figshare.com/ndownloader/files/19140113)
Supplement: Supplementary file 1 [file 19140113]

## Supporting Information

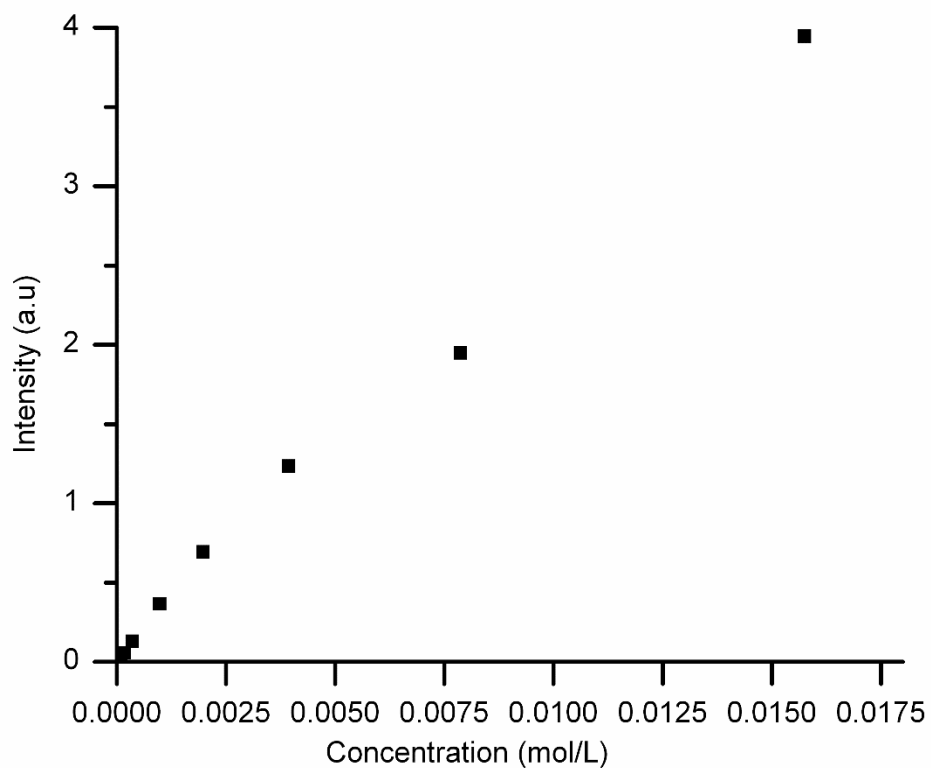

**Figure S1.** Alizarin Red S calibration curve. 100  $\mu\text{L}$  of Alizarin Red S solution was placed in a 96 well plate and absorbance was measured at 562 nm. The curve was linear with a  $R^2 = 0.99$ .

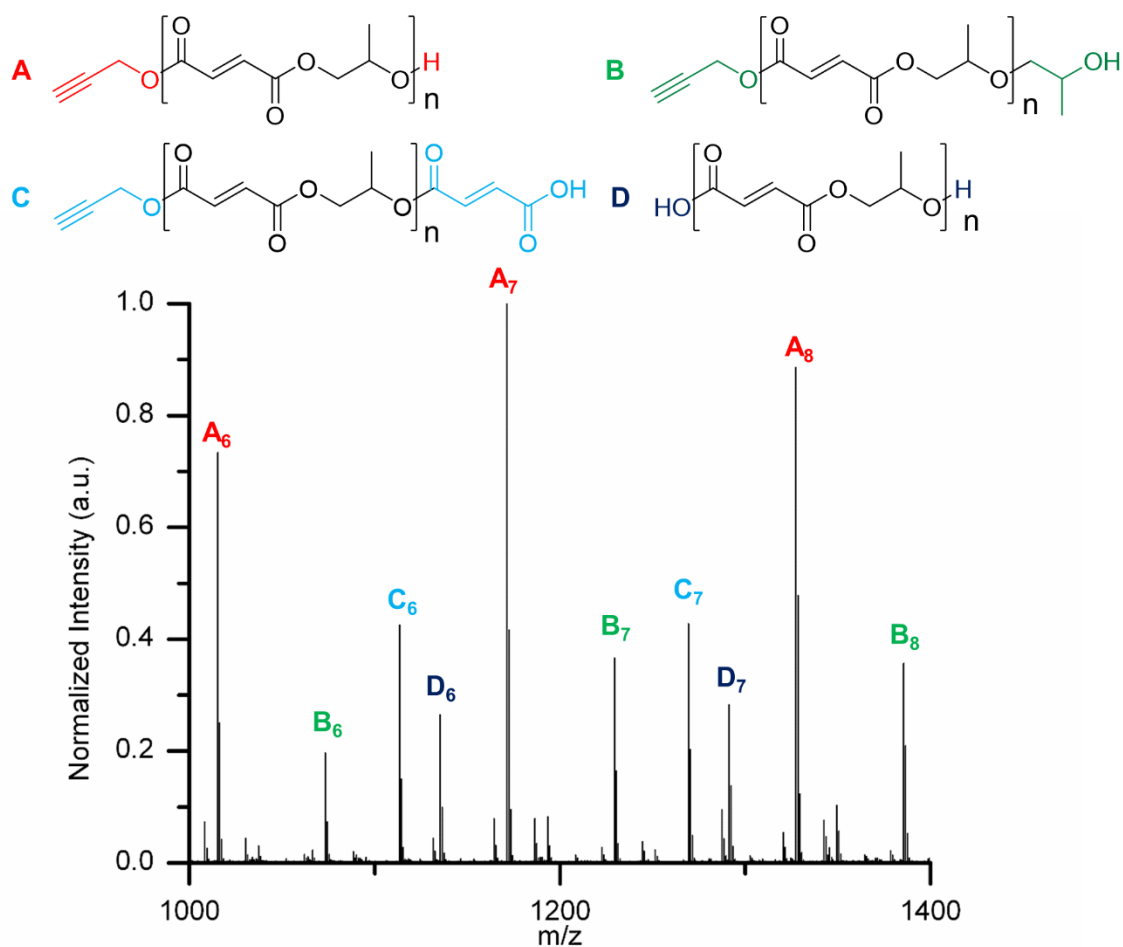

**Figure S2.** MALDI-ToF mass spectra of propargyl-functionalized poly(propylene fumarate) synthesized for Bioglass incorporation. Initiation with propargyl alcohol is observed with the addition of extra maleic anhydride or propylene oxide monomers.

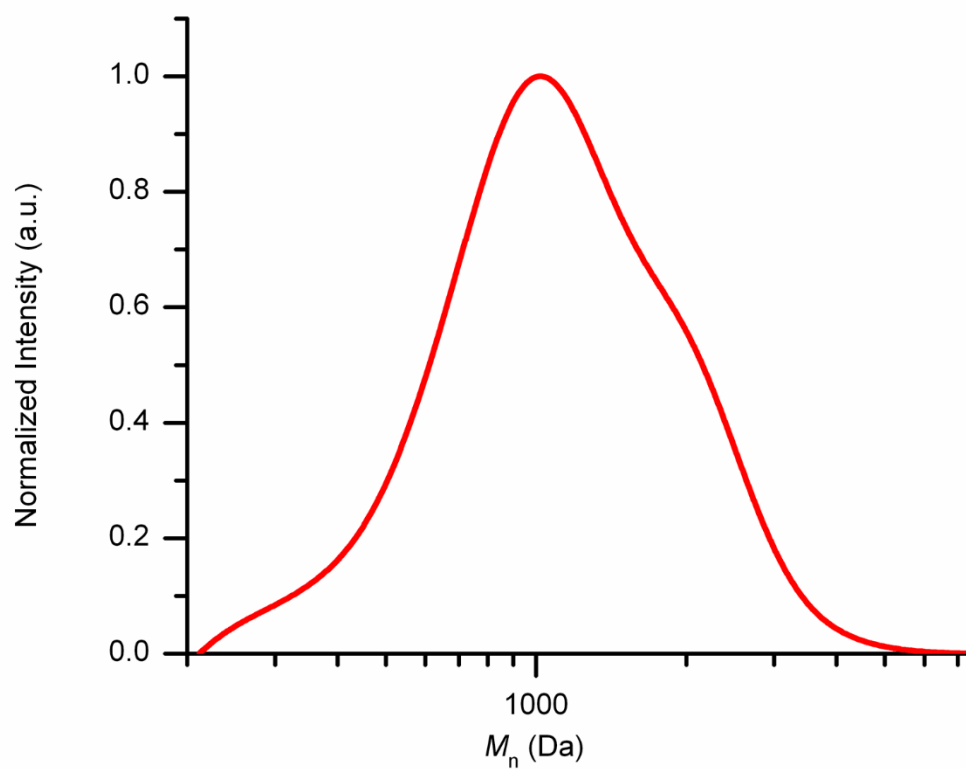

**Figure S3.** SEC chromatogram of propargyl-functionalized poly(propylene fumarate).

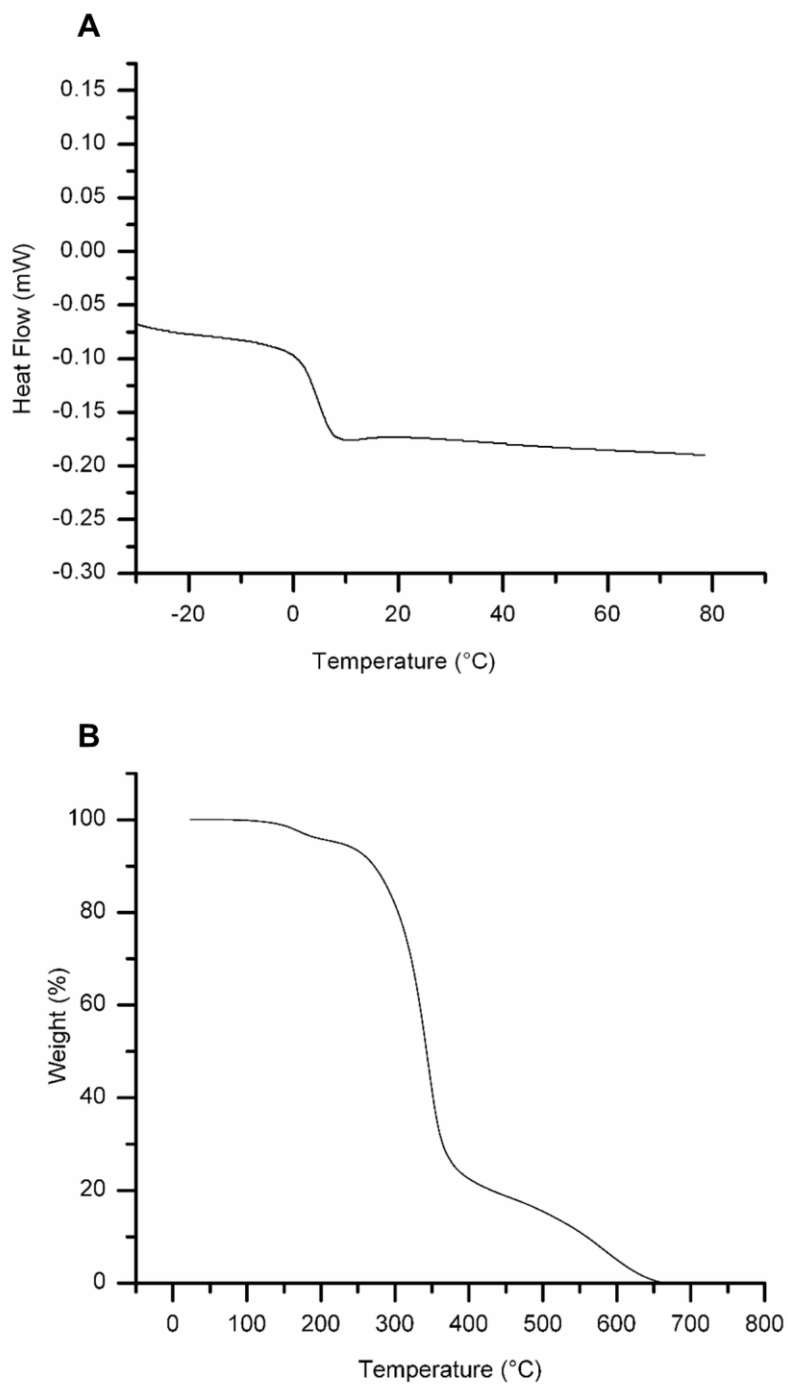

**Figure S4.** Thermal properties of propargyl-functionalized poly(propylene fumarate) were assessed using (A) differential scanning calorimetry (DSC) and shows a  $T_g$  below room temperature. (B) Thermogravimetric analysis (TGA).

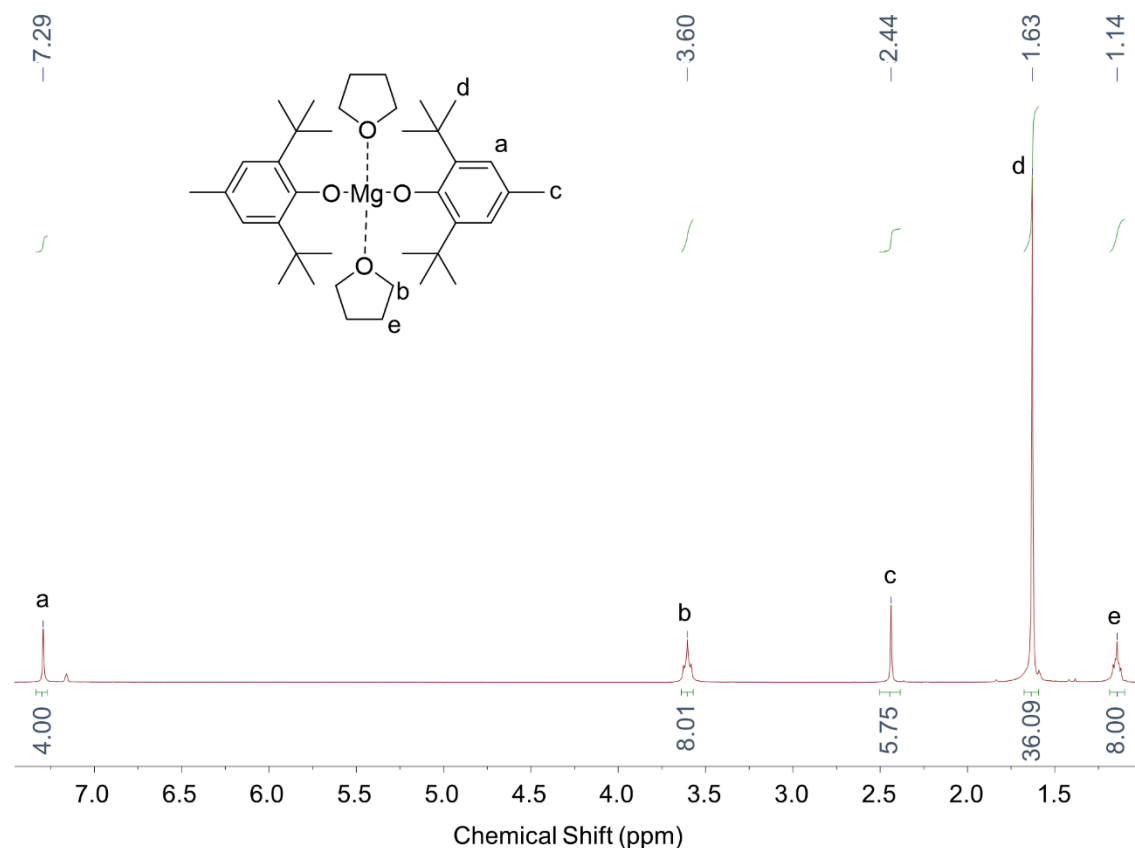

**Figure S5.**  $^1\text{H}$  NMR magnesium 2,6-di-*tert*-butyl-4-methylphenoxide catalyst for the synthesis of poly(propylene maleate).

**Table S1. Properties of Propargyl-Functionalized Poly(propylene fumarate)**

| Polymer                  | $M_n^a$<br>(kDa)<br>( $^1\text{H}$ NMR) | $M_n^b$<br>(kDa)<br>(SEC) | $M_w^b$<br>(kDa)<br>(SEC) | $\bar{D}_m^b$ | $^c\text{MAN}$<br>Conversion<br>(%) | $T_g$<br>( $^{\circ}\text{C}$ ) | $T_d$<br>( $^{\circ}\text{C}$ ) |
|--------------------------|-----------------------------------------|---------------------------|---------------------------|---------------|-------------------------------------|---------------------------------|---------------------------------|
| Poly(propylene fumarate) | 1.2                                     | 1.0                       | 1.3                       | 1.34          | 81                                  | 4.5                             | 260                             |

<sup>a</sup>Determined by end-group analysis using  $^1\text{H}$  NMR spectroscopy. <sup>b</sup>Determined from SEC in THF from poly(styrene) standards. The number average molecular mass ( $M_n$ ) and weight average molecular mass ( $M_w$ ) are reported with the molar mass distribution ( $\bar{D}_M$ ) being calculated from those values. <sup>c</sup>Monomer conversion determined by  $^1\text{H}$  NMR spectroscopy.

**Table S2. Zero shear viscosity ( $\eta_0$ ) of PPF-Bioglass resins**

| Bioglass wt%                   | 0    | 0.5  | 1    | 2.5  | 5    | 10   |
|--------------------------------|------|------|------|------|------|------|
| Zero-shear<br>viscosity (Pa*s) | 0.22 | 0.24 | 0.25 | 0.34 | 0.44 | 1.31 |
